# Supplementary material
Source: HighWire-hosted journal article supplement (https://gh.bmj.com/content/6/5/e005829)
Supplement: inline-supplementary-material-2 [file inline-supplementary-material-2.pdf]

**Appendix 2: Socio-demographic details of respondents**

| <b>Table 1: FGDs and SSIs with patients</b> |            |            |                           |                     |                       |                        |
|---------------------------------------------|------------|------------|---------------------------|---------------------|-----------------------|------------------------|
| <b>Data type</b>                            | <b>Age</b> | <b>Sex</b> | <b>Education in years</b> | <b>Occupation</b>   | <b>Hospital</b>       | <b>Location</b>        |
| <b>FGD Bhairahawa</b>                       |            |            |                           |                     |                       |                        |
| FGD_BP-1                                    | 46         | Male       | 10                        | Farmer              | Surgical ward/UCMS    | Bhairahawa, Province 5 |
|                                             | 36         | Female     | none                      | Farmer              |                       |                        |
|                                             | 33         | Male       | 9                         | Sweets seller       |                       |                        |
|                                             | 27         | Female     | 5                         | Housewife           |                       |                        |
|                                             | 61         | Female     | none                      | Housewife           |                       |                        |
| FGD_BP-2                                    | 21         | Female     | 12                        | Student             | Medical ward/UCMS     | Bhairahawa, Province 5 |
|                                             | 40         | Female     | 8                         | Housewife           |                       |                        |
|                                             | 21         | Male       | 9                         | Civil service       |                       |                        |
|                                             | 45         | Male       | 2                         | Farmer              |                       |                        |
| FGD_BP-3                                    | 42         | M          | 8                         | Ex-army             | Medical ward/UCMS     | Bhairahawa, Province 5 |
|                                             | 36         | F          | 8                         | Housewife           |                       |                        |
|                                             | 40         | F          | None                      | Laborer             |                       |                        |
|                                             | 57         | M          | 3                         | Technician          |                       |                        |
|                                             | 40         | M          | 10                        | Driving             |                       |                        |
|                                             | 35         | M          | 5                         | Construction worker |                       |                        |
| FGD_BP-4                                    | 60         | M          | 10                        | Laborer             | Medical ward/UCMS     | Bhairahawa Province 5  |
|                                             | 40         | F          | None                      | Farmer              |                       |                        |
|                                             | 52         | F          | 6                         | Farmer              |                       |                        |
|                                             | 74         | M          | 7                         | Farmer              |                       |                        |
|                                             | 56         | M          | 6                         | Farmer              |                       |                        |
|                                             | 24         | M          | 10                        | Technician          |                       |                        |
| FGD_BP-5                                    | 38         | M          | 8                         | Driving             | Medical ward/UCMS     | Bhairahawa, Province 5 |
|                                             | 21         | F          | 10                        | Housewife           |                       |                        |
|                                             | 22         | M          | 10                        | Clerk               |                       |                        |
|                                             | 28         | F          | 10                        | Housewife           |                       |                        |
|                                             | 30         | M          | 5                         | Technician          |                       |                        |
| <b>FGD Dharan</b>                           |            |            |                           |                     |                       |                        |
| FGD_DP-1                                    | 30         | Male       | CA                        | Banker              | Various wards/BPKIH S | Dharan, Province 1     |
|                                             | 33         | Male       | SLC                       | Business            |                       |                        |
|                                             | 32         | Male       | 8                         | Farmer              |                       |                        |
|                                             | 42         | Male       | 4                         | Farmer              |                       |                        |

|                      |          |        |                  |                |                       |                    |
|----------------------|----------|--------|------------------|----------------|-----------------------|--------------------|
| FGD_DP-2             | 36       | Male   | SLC              | Businessman    | Various wards/BPKIH S | Dharan, Province 1 |
|                      | 56       | Female | 7                | Housewife      |                       |                    |
|                      | 27       | Female | 8                | Housewife      |                       |                    |
|                      | 40       | Female | SLC              | Housewife      |                       |                    |
| FGD_DP-3             | 35       | M      | 3                | Farmer         | Various wards/BPKIH S | Dharan, Province 1 |
|                      | 43       | M      | 9                | Business       |                       |                    |
|                      | 28       | M      | 5                | Laborer        |                       |                    |
| <b>SSI Kathmandu</b> |          |        |                  |                |                       |                    |
| SSI_KP-1             | 44 years | Male   | 12               | Social service | Patan hospital        | Lalitpur, Bagmati  |
| SSI_KP-2             | 52       | M      | SLC              | Driver         | Patan hospital        | Lalitpur, Bagmati  |
| SSI_KP-3             | 31       | F      | Undergraduate    | Accountant     | Patan hospital        | Lalitpur, Bagmati  |
| SSI_KP-4             | 44       | M      | Bachelor in Arts | Businessman    | Patan hospital        | Lalitpur, Bagmati  |
| SSI_KP-5             | 51       | F      | SLC              | Housewife      | Patan hospital        | Lalitpur, Bagmati  |

| <b>Table 2: FGDs and SSIs with clinicians</b> |     |     |                    |                  |          |                        |
|-----------------------------------------------|-----|-----|--------------------|------------------|----------|------------------------|
| Data type                                     | Age | Sex | Education in years | Occupation       | Hospital | Location               |
| <b>FGD-Bhairahwa</b>                          |     |     |                    |                  |          |                        |
| FGD_BC-1                                      | 25  | M   | Intern             | Intern Physician | UCMS     | Bhairahawa, Province 5 |
|                                               | 26  | M   | Intern             | Intern Physician |          |                        |
|                                               | 25  | M   | Intern             | Intern Physician |          |                        |
|                                               | 26  | M   | Intern             | Intern Physician |          |                        |
|                                               | 25  | M   | Intern             | Intern Physician |          |                        |
| FGD_BC-2                                      | 25  | F   | Intern             | Intern Physician | UCMS     | Bhairahawa, Province 5 |
|                                               | 24  | F   | Intern             | Intern Physician |          |                        |
|                                               | 25  | F   | Intern             | Intern Physician |          |                        |
|                                               | 26  | F   | Intern             | Intern Physician |          |                        |
| SSI_BC-1                                      | 25  | M   | Intern             | Intern Physician | UCMS     | Bhairahawa, Province 5 |
| SSI_BC-2                                      | 26  | M   | Medical Officer    | Physician        | ER/UCMS  | Bhairahawa, Province 5 |

|                  |    |   |                                 |                  |                           |                         |
|------------------|----|---|---------------------------------|------------------|---------------------------|-------------------------|
| SSI_BC-3         | 32 | M | Resident Physician, second year | Physician        | Medicine Department /UCMS | Bhairahawa , Province 5 |
| SSI_BC-4         | 26 | M | Medical Officer                 | Physician        | ER                        | Bhairahawa , Province 5 |
| SSI_BC-5         | 32 | M | Resident physician              | Physician        | Medicine                  | Bhairahawa , Province 5 |
| SSI_BC-6         | 34 | M | Consultant , Internal Medicine  | Internist        | Medicine Department /UCMS | Bhairahawa , Province 5 |
| <b>Dharan</b>    |    |   |                                 |                  |                           |                         |
| FGD_DC-1         | 25 | M | Intern                          | Intern Physician | BPKIHS                    | Dharan Province 1       |
|                  | 25 | M | Intern                          | Intern Physician |                           |                         |
|                  | 26 | M | Intern                          | Intern Physician |                           |                         |
|                  | 26 | M | Intern                          | Intern Physician |                           |                         |
| FGD_DC-2         | 25 | F | Clinical Students               | Final year MBBS  | BPKIHS                    | Dharan Province 1       |
|                  | 24 | F | Clinical Students               | Final year MBBS  |                           |                         |
|                  | 25 | F | Clinical Students               | Final year MBBS  |                           |                         |
|                  | 26 | F | Clinical Students               | Final year MBBS  |                           |                         |
| FGD_DC-3         | 25 | M | Clinical Students               | Final year MBBS  | BPKIHS                    | Dharan Province 1       |
|                  | 24 | M | Clinical Students               | Final year MBBS  |                           |                         |
|                  | 23 | M | Clinical Students               | Final year MBBS  |                           |                         |
|                  | 24 | M | Clinical Students               | Final year MBBS  |                           |                         |
| FGD_DC-4         | 23 | M | Clinical Students               | Final year MBBS  | BPKIHS                    | Dharan Province 1       |
|                  | 24 | M | Clinical Students               | Final year MBBS  |                           |                         |
|                  | 24 | M | Clinical Students               | Final year MBBS  |                           |                         |
|                  | 26 | M | Clinical Students               | Final year MBBS  |                           |                         |
| <b>Kathmandu</b> |    |   |                                 |                  |                           |                         |
| SSI_KC-1         | 36 | M | MBBS                            | Physician        | PAHS                      | Lalitpur, Bagmati       |

|          |    |   |      |           |      |                   |
|----------|----|---|------|-----------|------|-------------------|
| SSI_KC-2 | 24 | F | MBBS | Physician | PAHS | Lalitpur, Bagmati |
| SSI_KC-3 | 29 | M | MBBS | Physician | PAHS | Lalitpur, Bagmati |
| SSI_KC-4 | 26 | M | MBBS | Physician | PAHS | Lalitpur, Bagmati |
| SSI_KC-5 | 24 | F | MBBS | Physician | PAHS | Lalitpur, Bagmati |

| <b>Table 3: FGDs and SSIs with dispensers</b> |            |            |                           |                   |                        |                        |
|-----------------------------------------------|------------|------------|---------------------------|-------------------|------------------------|------------------------|
| <b>Data type</b>                              | <b>Age</b> | <b>Sex</b> | <b>Education in years</b> | <b>Occupation</b> | <b>Hospital</b>        | <b>Location</b>        |
| <b>SSI-Dispenser-Bhairahawa</b>               |            |            |                           |                   |                        |                        |
| SSI_BD-1                                      | 20         | M          | SLC                       | Dispenser         | Private pharmacy       | Bhairahawa, Province 5 |
| SSI_BD-2                                      | 69         | M          | Bachelor in Arts          | Owner of Pharmacy | Private pharmacy       | Bhairahawa, Province 5 |
| SSI_BD-3                                      | 21         | M          | SLC                       | Dispenser         | Private pharmacy       | Bhairahawa, Province 5 |
| SSI_BD-4                                      | 49         | M          | SLC_CMA                   | Dispenser         | UCMS Hospital pharmacy | Bhairahawa, Province 5 |
| <b>SSI-Dispenser-Dharan</b>                   |            |            |                           |                   |                        |                        |
| SSI_DD-1                                      | 38         | M          | 10+2 Passed               | Pharmacy owner    | Private pharmacy       | Dharan Province 1      |
| SSI_DD-2                                      | 69         | M          | SLC                       | Pharmacy owner    | Private pharmacy       | Dharan Province 1      |
| SSI_DD-3                                      | 26         | M          | HA                        | Dispenser         | Private pharmacy       | Dharan Province 1      |
| <b>SSI-Dispenser-Kathmandu</b>                |            |            |                           |                   |                        |                        |
| SSI_KD-1                                      | 22         | F          | CMA                       | Dispenser         | Private pharmacy       | Lalitpur, Province 3   |
| SSI_KD-2                                      | 42         | M          | Intermediate              | Pharmacy owner    | Private pharmacy       | Lalitpur, Province 3   |
| SSI_KD-3                                      | 44         | M          | CMA                       | Dispenser         | Private pharmacy       | Lalitpur, Province 3   |
| SSI_KD-4                                      | 42         | F          | Intermediate              | Dispenser         | Private pharmacy       | Lalitpur, Province 3   |
| SSI_KD-5                                      | 23         | M          | 10+2                      | Dispenser         | Private pharmacy       | Lalitpur, Province 3   |
